# Supplementary material for: Molecular Mapping and Validation of a Major QTL Conferring Resistance to a Defoliating Isolate of Verticillium Wilt in Cotton (Gossypium hirsutum L.)
Source: PubMed Central journal article supplement (PMC4004561; doi:10.1371/journal.pone.0096226), 2014-04-29

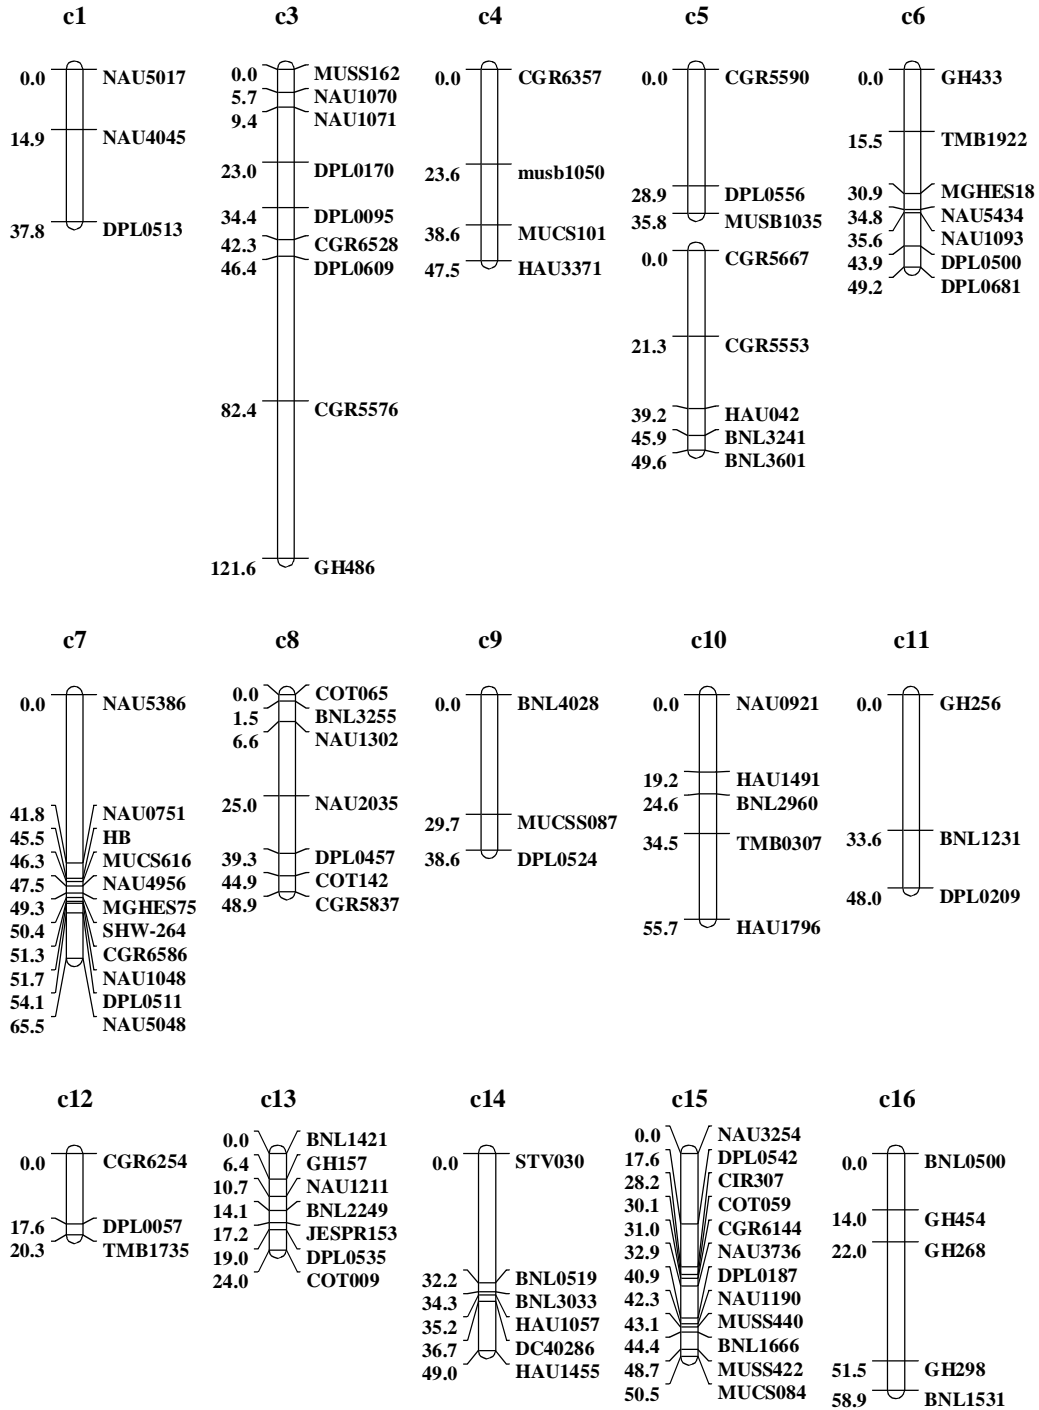

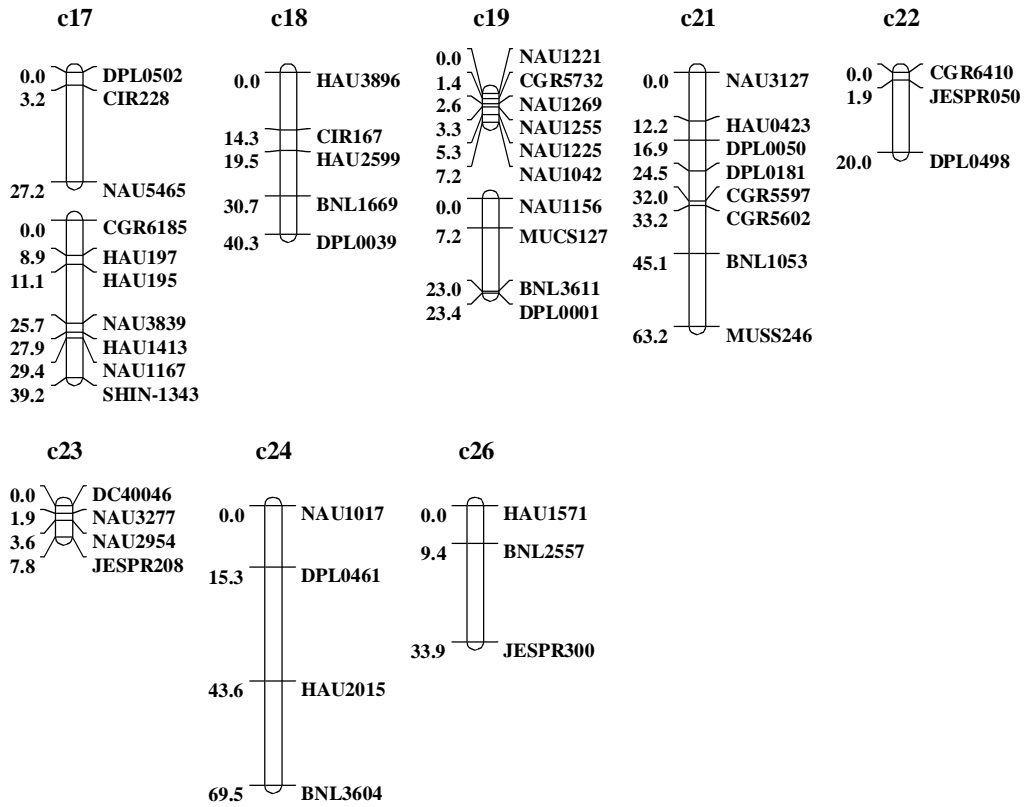

Supplement: pone.0096226.s001.pdf [file pone.0096226.s001.pdf]
